# Supplementary material for: Highly efficient and rapid Pb(ii) removal from acidic wastewater using superhydrophilic polystyrene phosphate resin
Source: Royal Society of Chemistry journal article supplement (doi:10.1039/d2nj03220a), 2022-01-01
Supplement: d2nj03220a6.pdf [file d2nj03220a6.pdf]

## Highly efficient and rapid Pb (II) removal from acidic wastewater using superhydrophilic polystyrene phosphate resin

Junhua Sun<sup>a</sup>, Xiuxian Zhao<sup>b</sup>, Guoxin Sun<sup>a,b</sup>, Heng Zhao<sup>a</sup>, Zhen Yang<sup>b</sup>, Liangguo Yan<sup>c</sup>,  
Xuchuan Jiang<sup>b,\*</sup>, Yu Cui<sup>a,\*</sup>

<sup>a</sup> School of Chemistry and Chemical Engineering, University of Jinan, 250022 Jinan,  
PR China

<sup>b</sup> Institute for Smart Materials & Engineering, University of Jinan, 250022 Jinan, PR  
China

<sup>c</sup> School of Water Conservancy and Environment, University of Jinan, 250022 Jinan,  
PR China

\* **Corresponding author:** E-mail: [ism\\_jiangxc@ujn.edu.cn](mailto:ism_jiangxc@ujn.edu.cn) (X.C. Jiang), [chm\\_cuiy@ujn.edu.cn](mailto:chm_cuiy@ujn.edu.cn)

[\(Y. Cui\)](#)

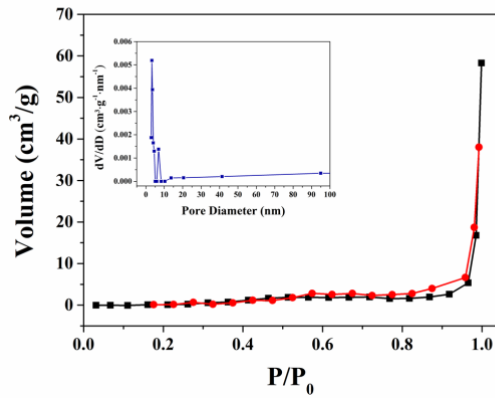

**Fig. S1** N<sub>2</sub> adsorption–desorption isotherms of PSP (inset: the corresponding pore size distribution curves).

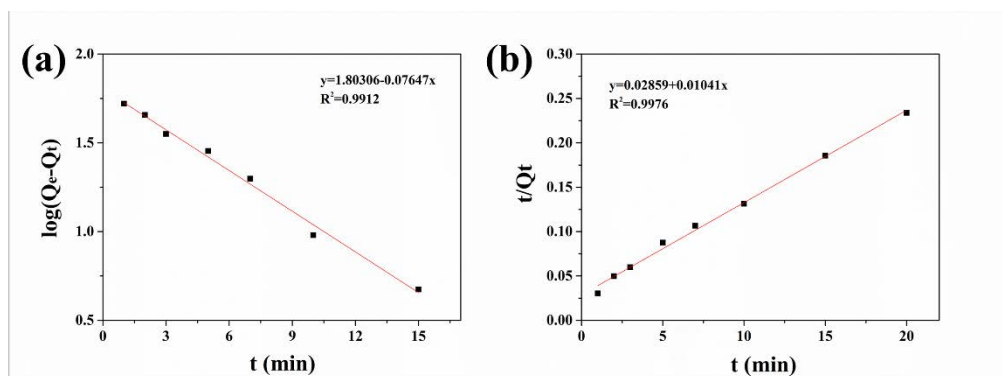

**Fig. S2** Fitting kinetic curves of PSP for Pb(II) (a) pseudo-first-order model (b) pseudo-second-order model (Pb(II)=100 mg·L<sup>-1</sup>, pH=4, 25 °C).

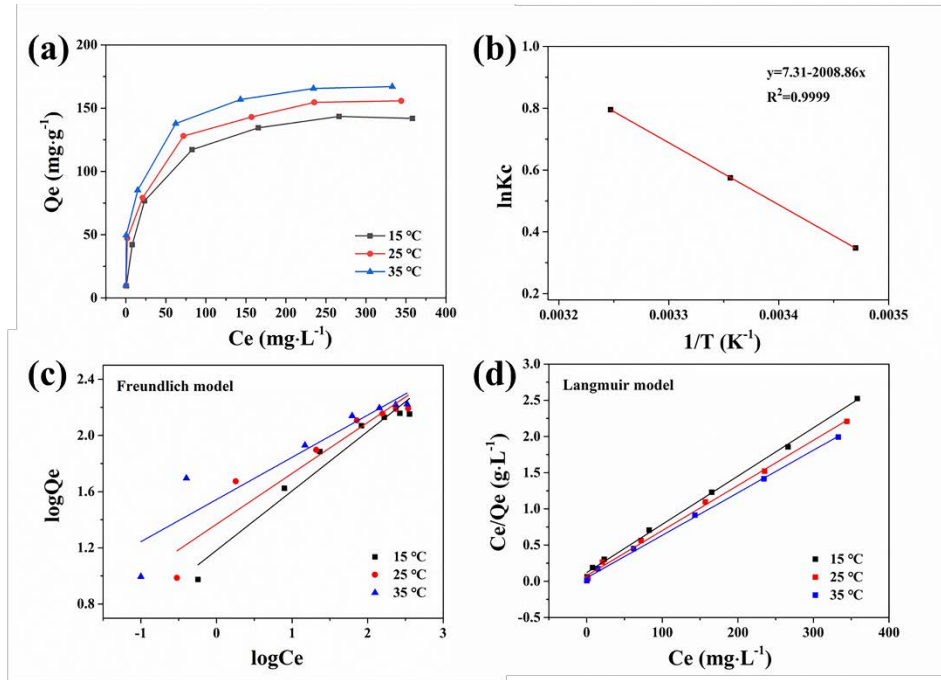

**Fig. S3** (a) Adsorption isotherms of Pb(II) on PSP resin. (b) Fitting plot between  $1/T$  and  $\ln K_c$ . The linear fitting plots of (c) Langmuir isotherm model (d) Freundlich isotherm model.

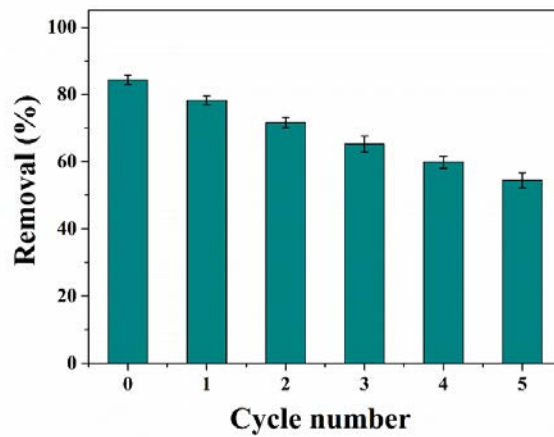

**Fig. S4** Removal ratio of Pb(II) at different regeneration cycles (Pb(II)=100 mg·L<sup>-1</sup>, pH=4, 25 °C).

**Table S1.** The removal ratio and distribution coefficients of PSP for six metal ions.

| Metal ion                   | Pb(II) | Cu(II) | Cd(II) | Zn(II) | Ni(II) | Co(II) |
|-----------------------------|--------|--------|--------|--------|--------|--------|
| R (%)                       | 76.5   | 42.9   | 51.6   | 31     | 16.1   | 9.3    |
| $K_d$ (mL·g <sup>-1</sup> ) | 3.2510 | 0.7526 | 1.0650 | 0.4499 | 0.1920 | 0.1032 |

**Table S2.** Parameters of linear pseudo-first-order model and pseudo-second-order model fitting.

| Metal ion | $C_0$ (ppm) | $Q_{exp}$ (mg·g <sup>-1</sup> ) | Pseudo-first-order model   |                                 |        | Pseudo-second-order model                      |                                 |        |
|-----------|-------------|---------------------------------|----------------------------|---------------------------------|--------|------------------------------------------------|---------------------------------|--------|
|           |             |                                 | $K_1$ (min <sup>-1</sup> ) | $Q_{cal}$ (mg·g <sup>-1</sup> ) | $R^2$  | $K_2$ (g·mg <sup>-1</sup> ·min <sup>-1</sup> ) | $Q_{cal}$ (mg·g <sup>-1</sup> ) | $R^2$  |
| Pb(II)    | 100         | 85.6                            | 0.1761                     | 63.54                           | 0.9912 | 0.0038                                         | 96.06                           | 0.9976 |

**Table S3.** Parameters of non-linear Langmuir and Freundlich isotherm models fitting for Pb(II) adsorption at 15 °C, 25 °C, 35 °C.

| Isotherm model | Parameters                      | Temperature |         |         |
|----------------|---------------------------------|-------------|---------|---------|
|                |                                 | 15 °C       | 25 °C   | 35 °C   |
| Langmuir       | $R^2$                           | 0.9981      | 0.9965  | 0.9976  |
|                | $K_L$ (L·mg <sup>-1</sup> )     | 0.0557      | 0.0810  | 0.1241  |
|                | $q_{max}$ (mg·g <sup>-1</sup> ) | 149.92      | 160.25  | 170.07  |
| Freundlich     | $R^2$                           | 0.9461      | 0.8967  | 0.8542  |
|                | $K_F$ (mg·g <sup>-1</sup> )     | 15.2086     | 23.3308 | 35.0130 |
|                | n                               | 2.3625      | 2.7605  | 3.3278  |

**Table S4.** The thermodynamic parameters for the adsorption of Pb (II).

| T (K) | $\Delta G$ (kJ mol <sup>-1</sup> ) | $\Delta H$ (kJ mol <sup>-1</sup> ) | $\Delta S$ (J mol <sup>-1</sup> K <sup>-1</sup> ) |
|-------|------------------------------------|------------------------------------|---------------------------------------------------|
| 288   | -0.80                              |                                    |                                                   |
| 298   | -1.41                              | 16.70                              | 60.78                                             |
| 308   | -2.02                              |                                    |                                                   |
